# Supplementary material
Source: PubMed Central journal article supplement (PMC4201140)
Supplement: supp_mol.114.093369_Supplemental_Data_93369.pdf [file supp_mol.114.093369_Supplemental_Data_93369.pdf]

## **Supplemental Data**

**Title: *In Silico* Identification of an Aryl Hydrocarbon Receptor (AHR)  
Antagonist with Biological Activity *In Vitro* and *In Vivo***

**Authors:** Ashley J. Parks, Michael. P. Pollastri, Mark. E. Hahn, Elizabeth A. Stanford, Olga Novikov, Diana G. Franks, Sarah E. Haigh, Supraja Narasimhan, Trent D. Ashton, Timothy G. Hopper, Dmytro Kozakov, Dimitri Beglov, Sandor Vajda, Jennifer J. Schlezinger, and David H. Sherr

**Journal Title:** Molecular Pharmacology

## Legends for Supplemental Table and Figures

### Table S1. Compounds screened for AHR antagonism

Chemical identifiers as defined by the suppliers are presented with the screening code used in the AHR antagonist screening assay (Figure 1).

### Figure S1. Chemical synthesis of (E)-1-Methyl-N-(2-methyl-4-(o-tolyldiazenyl)phenyl)-1H-pyrazole-5-carboxamide (CH223191)

### Figure S2. Structure of prototypic AHR-binding flavonoid pharmacophore

### Figure S3. CB7993113 has no effect on PPAR $\gamma$ -dependent or CMV-driven reporter activity.

**A)** Cos-7 cells were transiently transfected with human PPAR $\gamma$ 1 and RXR $\alpha$  vectors and with PPRE x3-TK-luc and CMV-eGFP reporter constructs. Transfected cultures received no treatment (Naïve) or were treated with Vh (DMSO, 0.1%) or rosiglitazone (1  $\mu$ M) and Vh, CB7993113 (10  $\mu$ M) or CH223191 (10  $\mu$ M) and incubated for 24 hrs. Luminescence and fluorescence were determined, and the data was normalized as described in the methods. Data are presented as means + SE from 3 independent experiments. **B)** Hs578T breast cancer cells were transfected with a CMV-driven, GFP reporter construct and received no treatment (Naïve) or were treated with Vh (DMSO, 0.1%) or 10<sup>-8</sup> M TCDD and Vh, CB7993113 (10  $\mu$ M) or CH223191 (10  $\mu$ M) and incubated for 24 hrs. GFP fluorescence was measured and the data were normalized to naïve controls. Data are presented as means + SE from 3 independent experiments.

### Figure S4. Titration of AHR-driven reporter activity induced by two AHR agonists, $\beta$ -NF and TCDD, in the presence of increasing concentrations of CB7993113.

H1G1.1c3 cells were cultured in 24 well plates at 80% confluency. Eight culture wells were treated with DMSO (vehicle) or 10<sup>-8</sup> – 10<sup>-5</sup>  $\beta$ -NF or 10<sup>-13</sup> – 10<sup>-9</sup> M TCDD and DMSO or 10<sup>-5</sup> – 10<sup>-7</sup> M CB7993113. EGFP fluorescence was analyzed 24 hours later. For each plate, specific fluorescence

was calculated by subtracting the background fluorescence in untreated wells from the fluorescence in vehicle- or compound-treated wells. AHR reporter activity was calculated by dividing by the specific fluorescence in the vehicle + agonist wells by the specific fluorescence in cultures treated with agonist alone for each given agonist concentration x 100%. Data are presented as mean specific fluorescence  $\pm$  SE from 6 experiments. The EC<sub>50</sub>s of  $\beta$ -NF in the presence of vehicle, 10<sup>-7</sup> M, 10<sup>-6</sup> M, or 10<sup>-5</sup> M CB7993113 were 1.3 x 10<sup>-7</sup>, 1.3 x 10<sup>-7</sup>, 2.9 x 10<sup>-7</sup>, and 8.3 x 10<sup>-7</sup> M respectively. The EC<sub>50</sub>s of TCDD in the presence of vehicle or 10<sup>-7</sup> M, 10<sup>-6</sup> M and 10<sup>-5</sup> M CB7993113 were 4 x 10<sup>-11</sup> M, 4.6 x 10<sup>-11</sup> M, 8.5 x 10<sup>-11</sup> M, and 2.7 x 10<sup>-10</sup> M respectively.

**Figure S5. Amino acid alignment of human HIF-2 $\alpha$  and AHR PAS-B Domain.**

## Supplementary Table 1

| Screening Assay # | Enamine ID | Screening Assay # | Enamine ID |
|-------------------|------------|-------------------|------------|
| 1                 | T0501-9773 | 51                | T0505-8385 |
| 2                 | T0507-2370 | 52                | T0508-7364 |
| 3                 | T0508-7672 | 53                | T5276832   |
| 4                 | T5302486   | 54                | T5529912   |
| 5                 | T5536847   | 55                | T5665053   |
| 6                 | T5681118   | 56                | T5717822   |
| 7                 | T5726634   | 57                | T5805518   |
| 8                 | T5838025   | 58                | T5862559   |
| 9                 | T5875879   | 59                | T5976989   |
| 10                | T5986510   | 60                | T6032701   |
| 11                | T0501-9818 | 61                | T6033155   |
| 12                | T0507-2873 | 62                | T6061108   |
| 13                | T0515-7358 | 63                | T6106824   |
| 14                | T5450127   | 64                | T6118415   |
| 15                | T5603773   | 65                | T6164360   |
| 16                | T5693589   | 66                | T6247359   |
| 17                | T5727286   | 67                | T6077698   |
| 18                | T5841903   | 68                | T6033206   |
| 19                | T5908589   | 69                | T6060685   |
| 20                | T6002589   | 70                | T6107516   |
| 21                | T0501-9907 | 71                | T6118586   |
| 22                | T0506-3864 | 72                | T6170751   |
| 23                | T5230304   | 73                | T6301455   |
| 24                | T5468580   | 74                | T6159188   |
| 25                | T5622457   | 75                | T6033534   |
| 26                | T5707977   | 76                | T6086942   |
| 27                | T5762336   | 77                | T6112909   |
| 28                | T5845992   | 78                | T6131098   |
| 29                | T5939191   | 79                | T6171936   |
| 30                | T6014132   | 80                | T6364988   |
| 31                | T0503-8345 | 81                | T0501-1630 |
| 32                | T0506-3804 | 82                | T6035815   |
| 33                | T5261692   | 83                | T6088078   |
| 34                | T5476786   | 84                | T6115956   |
| 35                | T5624621   | 85                | T6131670   |
| 36                | T5706093   | 86                | T5448133   |
| 37                | T5771531   | 87                | T6398500   |
| 38                | T5852139   | 88                | T6037099   |
| 39                | T5945123   | 89                | T6101869   |
| 40                | T6030469   | 90                | T6117358   |
| 41                | T0504-1409 | 91                | T6132178   |
| 42                | T0506-3959 | 92                | T6222062   |
| 43                | T5261702   | 93                | T6107523   |
| 44                | T5508023   | 94                | T6047668   |
| 45                | T5634895   | 95                | T6097419   |
| 46                | T5714320   | 96                | T6118411   |
| 47                | T5795841   | 97                | T6144982   |
| 48                | T5856326   | 98                | T6241149   |
| 49                | T5950758   | 99                | T6265240   |
| 50                | T6030776   |                   |            |

| Screening Assay # | ChemBridge ID | Screening Assay # | ChemBridge ID |
|-------------------|---------------|-------------------|---------------|
| 1                 | 5156165       | 50                | 7357044       |
| 2                 | 5352068       | 51                | 5248599       |
| 3                 | 5581448       | 52                | 5569064       |
| 4                 | 5705738       | 53                | 5677214       |
| 5                 | 5976634       | 54                | 5805653       |
| 6                 | 6059391       | 55                | 6059088       |
| 7                 | 6558694       | 56                | 6161011       |
| 8                 | 6621406       | 57                | 6618593       |
| 9                 | 6918072       | 58                | 6788192       |
| 10                | 7163277       | 59                | 7151789       |
| 11                | 5173554       | 60                | 7360091       |
| 12                | 5468610       | 61                | 7369144       |
| 13                | 5667663       | 62                | 7926807       |
| 14                | 5705739       | 63                | 7936252       |
| 15                | 6047828       | 64                | 7953721       |
| 16                | 6062948       | 65                | 7981918       |
| 17                | 6559445       | 66                | 9002969       |
| 18                | 6664782       | 67                | 9151226       |
| 19                | 6922452       | 68                | 7818296       |
| 20                | 7179549       | 69                | 7928457       |
| 21                | 5213139       | 70                | 7939693       |
| 22                | 5474257       | 71                | 7957821       |
| 23                | 5668526       | 72                | 7984223       |
| 24                | 5705740       | 73                | 9003564       |
| 25                | 6049391       | 74                | 9153126       |
| 26                | 6064523       | 75                | 7821536       |
| 27                | 6595639       | 76                | 7928604       |
| 28                | 6670861       | 77                | 7950050       |
| 29                | 6944233       | 78                | 7960033       |
| 30                | 7266786       | 79                | 7993113       |
| 31                | 5217850       | 80                | 9074501       |
| 32                | 5474898       | 81                | 7888075       |
| 33                | 5675160       | 82                | 7928611       |
| 34                | 5766077       | 83                | 7950985       |
| 35                | 6053584       | 84                | 7961424       |
| 36                | 6128127       | 85                | 7996236       |
| 37                | 6611231       | 86                | 9115460       |
| 38                | 6676538       | 87                | 7895416       |
| 39                | 7126201       | 88                | 7933482       |
| 40                | 7297569       | 89                | 7950998       |
| 41                | 5222560       | 90                | 7975312       |
| 42                | 5533454       | 91                | 7999051       |
| 43                | 5675746       | 92                | 9121866       |
| 44                | 5769003       | 93                | 7918857       |
| 45                | 6054232       | 94                | 7933763       |
| 46                | 6131413       | 95                | 7952392       |
| 47                | 6616690       | 96                | 7976646       |
| 48                | 6685172       | 97                | 9002034       |
| 49                | 7131211       | 98                | 9142247       |

Supplementary Figure 1

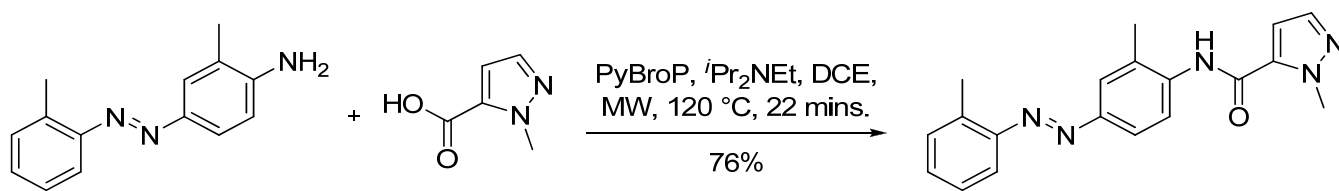

Supplementary Figure 2

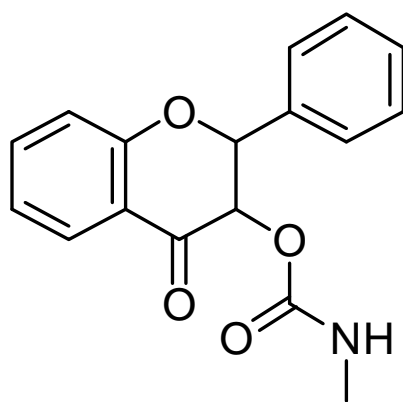

4-oxo-2-phenylchroman-3-yl methylcarbamate

### Supplementary Figure 3

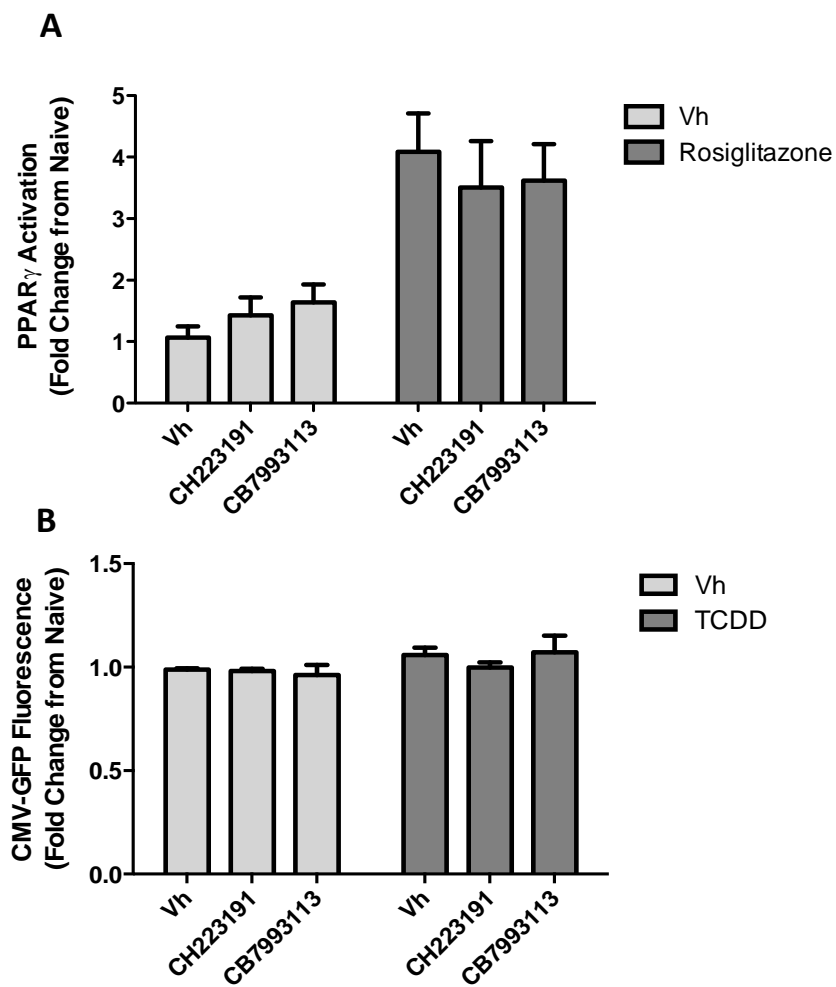

Supplementary Figure 4

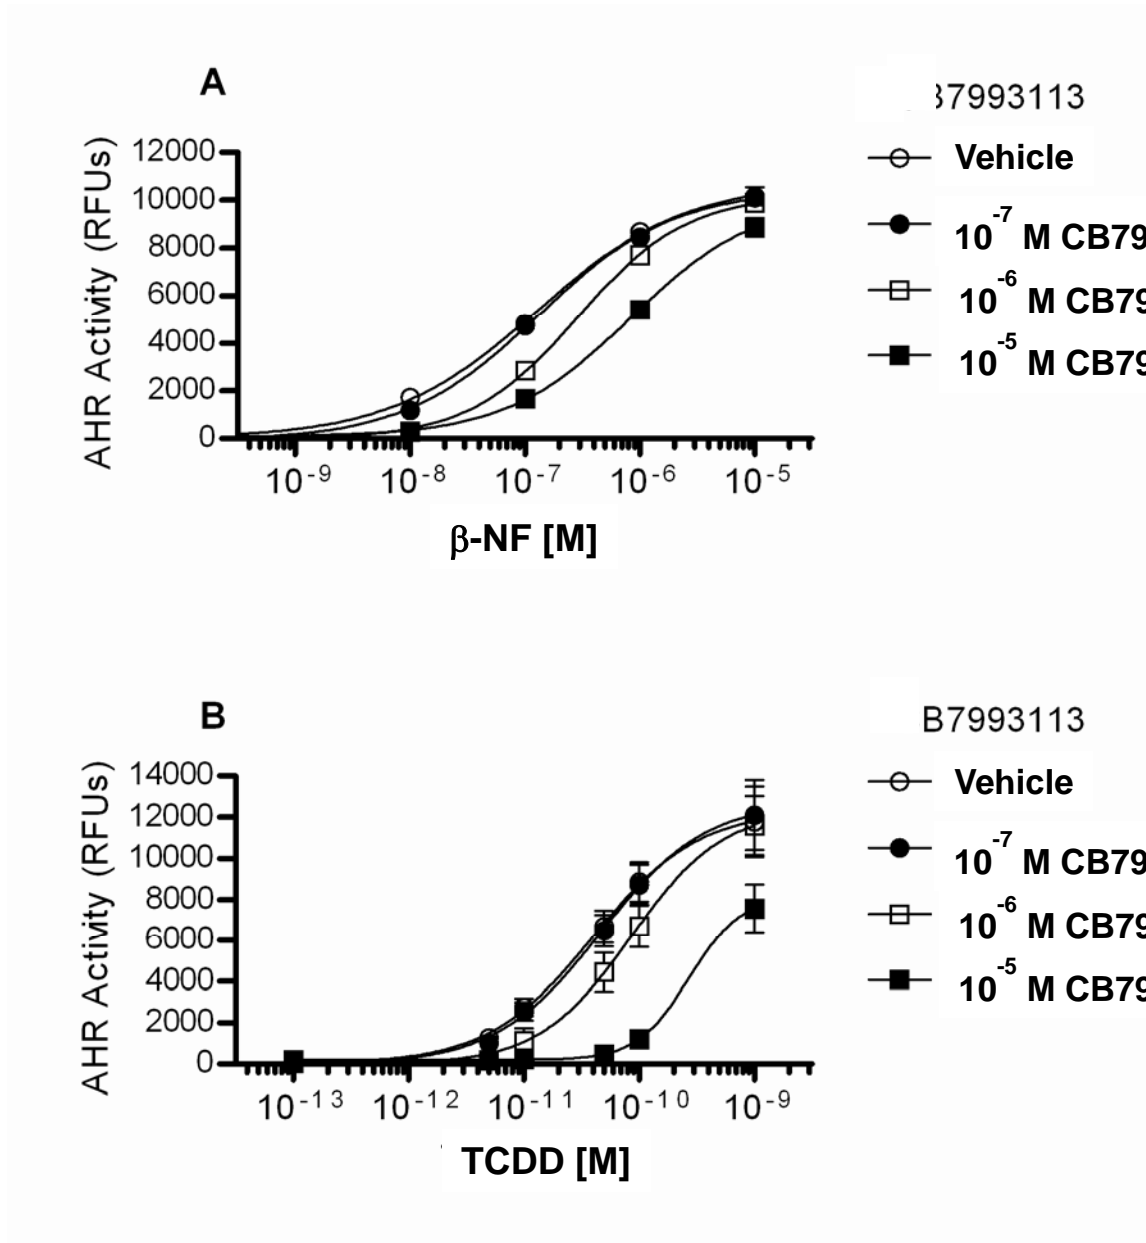



## Supplementary Figure 5

Range 1: 244 to 348 [Graphics](#)[▼ Next Match](#) [▲ Previous Match](#)

| Score          | Expect | Method                                                       | Identities  | Positives   | Gaps      |
|----------------|--------|--------------------------------------------------------------|-------------|-------------|-----------|
| 50.4 bits(119) | 3e-12  | Composition-based stats.                                     | 29/106(27%) | 53/106(50%) | 3/106(2%) |
| Query          | 287    | FRTKHKLDFTPIGCDAKGRIVLGYTEAELCTRGSGYQFIHAADMLYCAESHIRMIKTGES |             |             | 346       |
|                |        | F ++H +D CD + ++GY EL R S Y+F HA D +SH + G+                  |             |             |           |
| Sbjct          | 244    | FLSRHSMDMKFTYCDDRITELIGYHPEELLGR-SAYEFYHALDSENMTKSHQNLCTKGQV |             |             | 302       |
| Query          | 347    | GMIVFRLLTKNNRWTWVQSNARLLY--KNGRPDYIIIVTQRPLTDEE              |             |             | 390       |
|                |        | +R+L K+ + W+++ ++Y +N +P I+ L++ E                            |             |             |           |
| Sbjct          | 303    | VSGQYRMLAKHGGYVWLETQGTVIYNPRNLQPQCIMCVNYVLSEIE               |             |             | 348       |
